# Supplementary material for: High-Frequency Heating Extraction Method for Sensitive Drug Analysis in Human Nails
Source: MDPI journal article supplement (doi:10.3390/molecules23123231), 2018-12-07
Supplement: s1 [file s1]

## High-frequency Heating Extraction Method for Sensitive Drug Analysis in Human nails

Fumiki Takahashi <sup>1,\*</sup>, Masaru Kobayashi <sup>2</sup>, Atsushi Kobayashi <sup>2</sup>, Kanya Kobayashi <sup>3,\*</sup> and Hideki Asamura <sup>3</sup>

<sup>1</sup> Department of Chemistry, Faculty of Science, Shinshu University, 3-1-1 Asahi, Nagano 390-8621, Japan

<sup>2</sup> Research Institute of Scientific Criminal Investigation, Nagano Prefectural Police Headquarters, 3916 Nishijo, Matsushiro, Nagano 381-1232, Japan; takahashi@shinshu-u.ac.jp

<sup>3</sup> Department of Legal Medicine, Shinshu University School of Medicine, 3-1-1 Asahi, Matsumoto, Nagano 390-8621, Japan; kanya\_k@shinshu-u.ac.jp

\* Correspondence: takahashi@shinshu-u.ac.jp (F.T.); Tel.: +81-263-37-2474

kanya\_k@shinshu-u.ac.jp (K.K.); Tel.: +81-263-37-2474

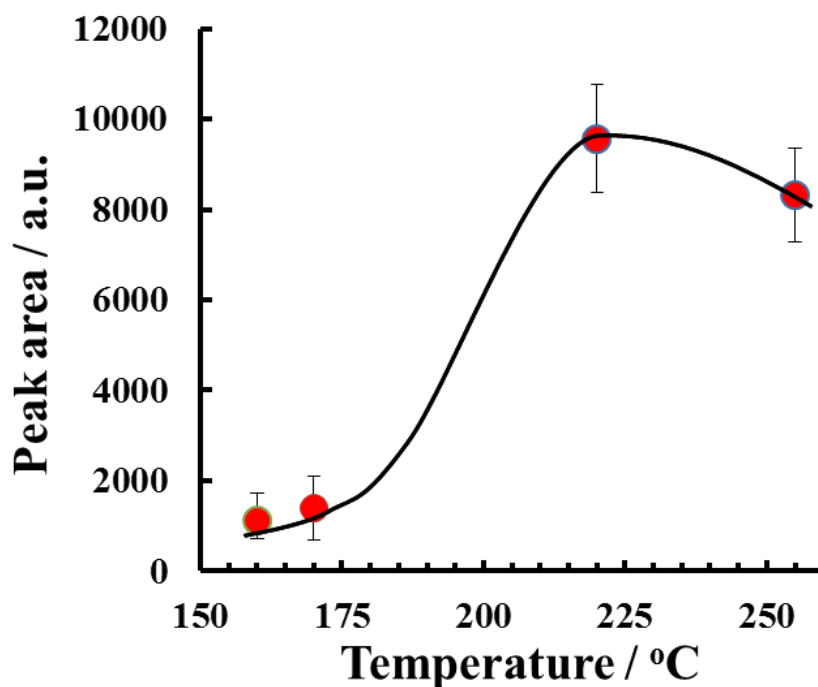

**Figure S1.** Dependence of the caffeine peak area on the extraction temperature for extraction of caffeine from nails. The sample mass was 10 mg and the H-F heating extraction was carried out at 220 °C. Error bars represent the standard deviation ( $n = 3$ ).

**Figure S1.** F. Takahashi
